# Supplementary material for: N-Heterocyclic imine-based bis-gallium(i) carbene analogs featuring a four-membered Ga2N2 ring
Source: Royal Society of Chemistry journal article supplement (doi:10.1039/d3dt00782k), 2023-01-01
Supplement: d3dt00782k1.pdf [file d3dt00782k1.pdf]

## **N-heterocyclic imine-based bis-gallium(I) carbene analog featuring a four-membered Ga<sub>2</sub>N<sub>2</sub> ring**

Bing Wang,<sup>a</sup> Wenhao Chen,<sup>a</sup> Jiangnan Yang,<sup>a</sup> Linfang Lu,<sup>a</sup> Jiyong Liu,<sup>c</sup> Liang Shen,<sup>a</sup>

Di Wu<sup>\*a,b</sup>

<sup>a</sup>College of Materials, Chemistry and Chemical Engineering, Key Laboratory of Organosilicon Chemistry and Material Technology, Ministry of Education, Hangzhou Normal University, Hangzhou 311121, China; wudi@hznu.edu.cn

<sup>b</sup>Hubei Key Laboratory of Quality Control of Characteristic Fruits and Vegetables, Hubei Engineering University, Hubei 432000, China

<sup>c</sup>Department of Chemistry, Zhejiang University. Hangzhou 310027, China

### **CONTENTS**

1. UV-Vis spectrum of compound **1**
2. Crystal Structure Determination
3. Theoretical calculations
4. References
5. NMR spectra

## 1. UV-Vis spectrum of compound 1

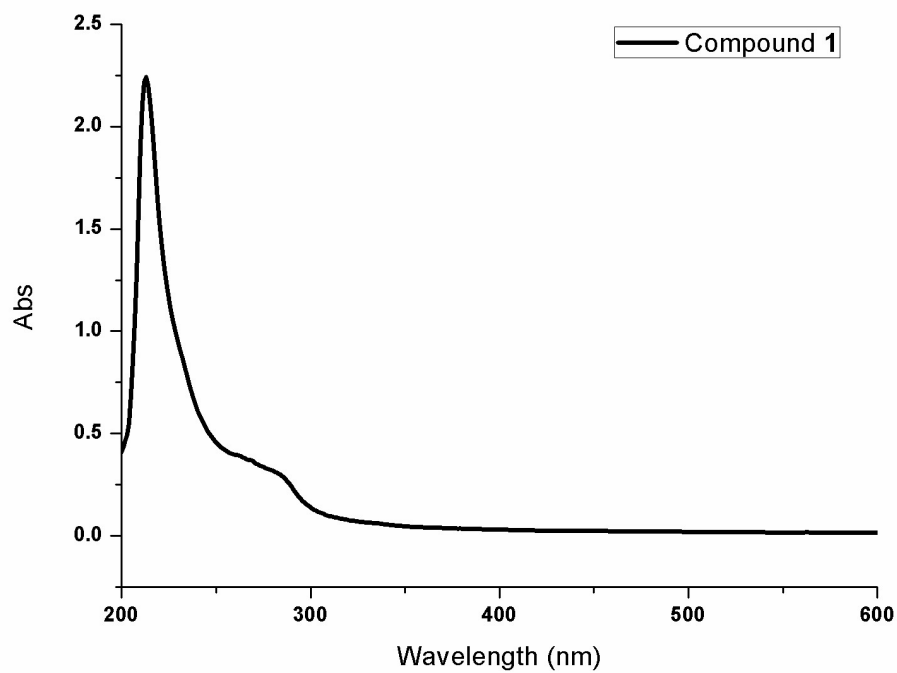

**Figure S1.** UV-Vis absorption spectrum of compound **1** ( $10^{-5}$  M) in hexane (Ultraviolet spectrum was recorded on a Perkin Elmer Lambda 750 UV/Vis spectrophotometer).

## 2. Crystal Structure Determination of Compounds 1, 2, 3, 4, and 5

X-ray data collection and structural refinement. Intensity data for compounds **1**, **2**, **3**, **4**, and **5** were collected using a Bruker D8 Venture diffractometer. The crystals of **1**, **2**, **3**, **4**, and **5** were measured at 170 K. The structure was solved by direct phase determination (SHELXS-97)<sup>[S1]</sup> and refined for all data by full-matrix least squares methods on  $F^2$ .<sup>[S2]</sup> All non-hydrogen atoms were subjected to anisotropic refinement. The hydrogen atoms were generated geometrically and allowed to ride in their respective parent atoms; they were assigned appropriate isotropic thermal parameters and included in the structure-factor calculations. CCDC: 2168820-2168824 contains the supplementary crystallographic data for this paper. The data can be obtained free of charge from the Cambridge Crystallography Data Center via [www.ccdc.cam.ac.uk/data\\_request/cif](http://www.ccdc.cam.ac.uk/data_request/cif).

**Table S1.** Summary of Data Collection and Structure Refinement of **1**, **2**, **3**, **4**, and **5**.

|                                                   | <b>1</b>                                                       | <b>2·(C<sub>6</sub>H<sub>6</sub>)<sub>2</sub></b>                                                           | <b>3·(C<sub>6</sub>H<sub>6</sub>)</b>                                         |
|---------------------------------------------------|----------------------------------------------------------------|-------------------------------------------------------------------------------------------------------------|-------------------------------------------------------------------------------|
| Formula                                           | C <sub>54</sub> H <sub>72</sub> Ga <sub>2</sub> N <sub>6</sub> | C <sub>70</sub> H <sub>90</sub> F <sub>6</sub> Ga <sub>2</sub> N <sub>6</sub> O <sub>6</sub> S <sub>2</sub> | C <sub>88</sub> H <sub>94</sub> Ga <sub>2</sub> N <sub>6</sub> O <sub>4</sub> |
| Fw                                                | 944.61                                                         | 1429.03                                                                                                     | 1439.13                                                                       |
| cryst system                                      | monoclinic                                                     | monoclinic                                                                                                  | tetragonal                                                                    |
| space group                                       | P2 <sub>1</sub> /c                                             | C2/c                                                                                                        | P-4                                                                           |
| Size (mm <sup>3</sup> )                           | 0.36 × 0.07 × 0.05                                             | 0.08 × 0.04 × 0.03                                                                                          | 0.48 × 0.32 × 0.29                                                            |
| T, K                                              | 170.00                                                         | 170.00                                                                                                      | 170.00                                                                        |
| <i>a</i> , Å                                      | 31.3223(16)                                                    | 21.4469(7)                                                                                                  | 19.4930(3)                                                                    |
| <i>b</i> , Å                                      | 12.3615(6)                                                     | 17.9353(6)                                                                                                  | 19.4930(3)                                                                    |
| <i>c</i> , Å                                      | 30.9147(16)                                                    | 18.5471(6)                                                                                                  | 10.5729(3)                                                                    |
| α, deg                                            | 90                                                             | 90                                                                                                          | 90                                                                            |
| β, deg                                            | 118.4170(10)                                                   | 105.1940(10)                                                                                                | 90                                                                            |
| γ, deg                                            | 90                                                             | 90                                                                                                          | 90                                                                            |
| V, Å <sup>3</sup>                                 | 10527.6(9)                                                     | 6884.9(4)                                                                                                   | 4017.46(17)                                                                   |
| Z                                                 | 8                                                              | 4                                                                                                           | 2                                                                             |
| ρ <sub>calc</sub> g·cm <sup>-3</sup>              | 1.192                                                          | 1.379                                                                                                       | 1.190                                                                         |
| μ, mm <sup>-1</sup>                               | 1.063                                                          | 0.915                                                                                                       | 0.723                                                                         |
| Refl collected                                    | 118009                                                         | 48398                                                                                                       | 66333                                                                         |
| <i>T</i> <sub>min</sub> / <i>T</i> <sub>max</sub> | 0.62/0.746                                                     | 0.699/0.746                                                                                                 | 0.636/0.746                                                                   |
| Independent refl                                  | 23225                                                          | 7583                                                                                                        | 8846                                                                          |
| [R <sub>int</sub> ]                               | 0.1165                                                         | 0.0583                                                                                                      | 0.0410                                                                        |
| <i>R</i>                                          | 0.0558                                                         | 0.0307                                                                                                      | 0.0253                                                                        |
| [I>2σ(I)]                                         |                                                                |                                                                                                             |                                                                               |
| <i>R</i> <sub>w</sub> [I>2σ(I)]                   | 0.1093                                                         | 0.0755                                                                                                      | 0.0643                                                                        |

|                                                   |            |            |            |
|---------------------------------------------------|------------|------------|------------|
| GOF                                               | 1.014      | 1.038      | 1.040      |
| Largest diff<br>peak/hole[e·<br>Å <sup>-3</sup> ] | 0.80/-0.85 | 0.68/-0.48 | 0.24/-0.21 |

|                                                   | <b>4</b>                                                                      | <b>5</b>                                                                       |
|---------------------------------------------------|-------------------------------------------------------------------------------|--------------------------------------------------------------------------------|
| Formula                                           | C <sub>78</sub> H <sub>92</sub> Ga <sub>2</sub> N <sub>6</sub> S <sub>4</sub> | C <sub>54</sub> H <sub>72</sub> Cl <sub>2</sub> Ge <sub>2</sub> N <sub>6</sub> |
| Fw                                                | 1381.25                                                                       | 1021.25                                                                        |
| cryst system                                      | monoclinic                                                                    | monoclinic                                                                     |
| space group                                       | P2 <sub>1</sub> /c                                                            | P2 <sub>1</sub> /n                                                             |
| Size (mm <sup>3</sup> )                           | 0.38 × 0.2 × 0.19                                                             | 0.09 × 0.04 × 0.03                                                             |
| T, K                                              | 170.00                                                                        | 170.00                                                                         |
| a, Å                                              | 12.7756(18)                                                                   | 12.797(2)                                                                      |
| b, Å                                              | 23.239(3)                                                                     | 13.824(2)                                                                      |
| c, Å                                              | 12.8137(17)                                                                   | 15.574(2)                                                                      |
| α, deg                                            | 90                                                                            | 90                                                                             |
| β, deg                                            | 114.876(5)                                                                    | 103.570(5)                                                                     |
| γ, deg                                            | 90                                                                            | 90                                                                             |
| V, Å <sup>3</sup>                                 | 3451.3(8)                                                                     | 2678.2(7)                                                                      |
| Z                                                 | 2                                                                             | 2                                                                              |
| ρ <sub>calc</sub> g·cm <sup>-3</sup>              | 1.329                                                                         | 1.266                                                                          |
| μ, mm <sup>-1</sup>                               | 0.950                                                                         | 1.262                                                                          |
| Refl collected                                    | 46214                                                                         | 23120                                                                          |
| T <sub>min</sub> /T <sub>max</sub>                | 0.525/0.746                                                                   | 0.602/0.746                                                                    |
| Independent<br>refl                               | 7593                                                                          | 5886                                                                           |
| [R <sub>int</sub> ]                               | 0.092                                                                         | 0.0961                                                                         |
| R                                                 | 0.0596                                                                        | 0.0779                                                                         |
| [I>2sigma(I)]                                     |                                                                               |                                                                                |
| R <sub>w</sub> [I>2sigma(I)]                      | 0.1618                                                                        | 0.1891                                                                         |
| GOF                                               | 1.053                                                                         | 1.036                                                                          |
| Largest diff<br>peak/hole[e·<br>Å <sup>-3</sup> ] | 1.75/-1.31                                                                    | 1.27/-1.04                                                                     |

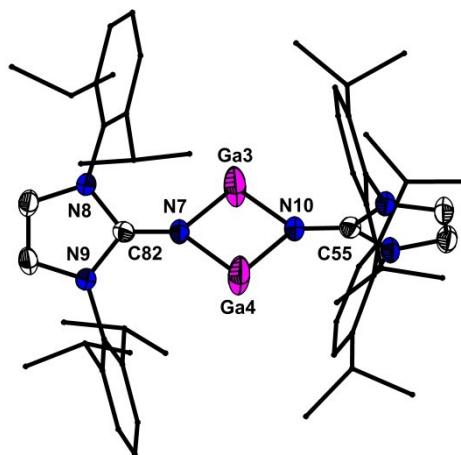

**Figure S2.** Twinned molecular structure of **1** (H atoms are omitted for clarity). Selected bond lengths (Å) and angles (°): Ga3-N7 2.015(3), Ga3-N10 2.014(3), Ga4-N7 2.012(3), Ga4-N10 2.009(3), N7-C82 1.283(4), N10-C55 1.287(4), C82-N8 1.396(4), C82-N9 1.397(4); N7-Ga3-N10 82.20(11), N7-Ga4-N10 82.40(11), Ga3-N7-Ga4 97.64(10), Ga3-N10-Ga4 97.72(11), Ga3-N7-C82 131.6(2), Ga4-N7-C82 130.7(2).

### 3. Theoretical calculations

Gaussian 09E (16 C.01) was used for all density functional theory (DFT) calculations.<sup>[S3]</sup>

Geometry optimization, frequency calculations, and Natural bond order (NBO) analysis on compound **1** was performed at the B3LYP/6-311G(d,p) level of theory.

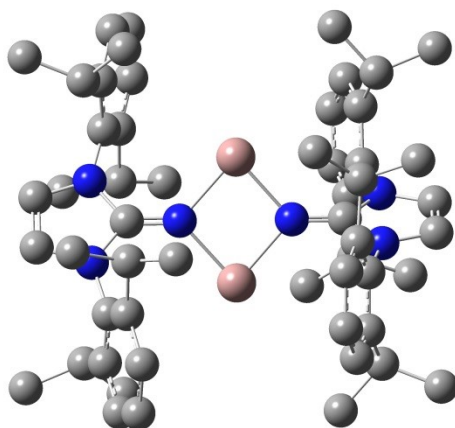

**Figure S3.** Calculated optimized structures for **1** at B3LYP/6-311G(d,p) level of theory.

**Table S2.** Optimized structures of **1** (atom, x-, y-, z- positions in Å)

|    |             |             |             |
|----|-------------|-------------|-------------|
| Ga | 0.00512609  | -1.02457421 | -1.17762328 |
| Ga | 0.00567019  | 1.02452939  | 1.17763679  |
| N  | -1.36718296 | 0.00062991  | -0.00026587 |
| N  | -3.52759927 | 1.08697549  | 0.20090186  |
| N  | -3.52885384 | -1.08286177 | -0.20282873 |
| N  | 1.35621550  | -0.00036234 | -0.00006055 |
| N  | 3.51722569  | -1.03761333 | 0.37990793  |
| N  | 3.51888003  | 1.03367863  | -0.37889929 |
| C  | -2.65195045 | 0.00149014  | -0.00066468 |
| C  | -4.85697572 | -0.65800107 | -0.12453281 |
| H  | -5.67535583 | -1.34411807 | -0.25226150 |
| C  | -4.85621374 | 0.66375946  | 0.12192727  |
| H  | -5.67379825 | 1.35094088  | 0.24903646  |
| C  | -3.14883337 | -2.44474637 | -0.45910978 |
| C  | -3.23979693 | -2.94339166 | -1.77299897 |
| C  | -2.91421440 | -4.28633874 | -1.98638836 |
| H  | -2.97450335 | -4.69609012 | -2.98780819 |
| C  | -2.50018378 | -5.09802016 | -0.94025350 |
| H  | -2.24112414 | -6.13434639 | -1.12818616 |
| C  | -2.41798683 | -4.58633241 | 0.34994440  |
| H  | -2.09668531 | -5.23289537 | 1.15678673  |

|   |             |             |             |
|---|-------------|-------------|-------------|
| C | -2.74710653 | -3.25695661 | 0.62161662  |
| C | -3.69779994 | -2.08237137 | -2.94583145 |
| H | -3.73286658 | -1.04660542 | -2.60282201 |
| C | -5.12002587 | -2.47110271 | -3.39580878 |
| H | -5.14742737 | -3.50161653 | -3.76255999 |
| H | -5.45689818 | -1.81753014 | -4.20598532 |
| H | -5.83938791 | -2.39110729 | -2.57697857 |
| C | -2.71969224 | -2.13529846 | -4.13306241 |
| H | -1.70781459 | -1.87171773 | -3.81872013 |
| H | -3.03602353 | -1.43142560 | -4.90878703 |
| H | -2.68678467 | -3.12953382 | -4.58786441 |
| C | -2.72644680 | -2.72588130 | 2.05130402  |
| H | -2.54479746 | -1.65114302 | 1.99835594  |
| C | -4.09547057 | -2.94314318 | 2.72844581  |
| H | -4.90191053 | -2.45981968 | 2.17269062  |
| H | -4.09055151 | -2.52989557 | 3.74169182  |
| H | -4.32676670 | -4.01047406 | 2.79997811  |
| C | -1.60371096 | -3.32509474 | 2.91191420  |
| H | -1.77117326 | -4.38491505 | 3.12635812  |
| H | -1.56059504 | -2.80605500 | 3.87337889  |
| H | -0.62924932 | -3.22555957 | 2.42992271  |
| C | -3.14604965 | 2.44826392  | 0.45807537  |
| C | -2.74225129 | 3.26037902  | -0.62197676 |
| C | -2.41151536 | 4.58916980  | -0.34947049 |
| H | -2.08850280 | 5.23559762  | -1.15573408 |
| C | -2.49428719 | 5.10048162  | 0.94085088  |
| H | -2.23400379 | 6.13638394  | 1.12942603  |
| C | -2.91040247 | 4.28895621  | 1.98626814  |
| H | -2.97111797 | 4.69840396  | 2.98778471  |
| C | -3.23751832 | 2.94650352  | 1.77206878  |
| C | -2.72103444 | 2.72973165  | -2.05182111 |
| H | -2.53973355 | 1.65491022  | -1.99908923 |
| C | -4.08967190 | 2.94764427  | -2.72955610 |
| H | -4.89653695 | 2.46435311  | -2.17440588 |
| H | -4.08437003 | 2.53478757  | -3.74295927 |
| H | -4.32058503 | 4.01507862  | -2.80078520 |
| C | -1.59779124 | 3.32889183  | -2.91178952 |
| H | -1.76495548 | 4.38879338  | -3.12608092 |
| H | -1.55439242 | 2.81005914  | -3.87335099 |
| H | -0.62353298 | 3.22905097  | -2.42944603 |
| C | -3.69751715 | 2.08561641  | 2.94423391  |
| H | -3.73371787 | 1.05003497  | 2.60077934  |
| C | -5.11952887 | 2.47601953  | 3.39340350  |

|   |             |             |             |
|---|-------------|-------------|-------------|
| H | -5.14585912 | 3.50644311  | 3.76048348  |
| H | -5.45777354 | 1.82260975  | 4.20313938  |
| H | -5.83845439 | 2.39720897  | 2.57407606  |
| C | -2.72012634 | 2.13676005  | 4.13214684  |
| H | -1.70832947 | 1.87223630  | 3.81833817  |
| H | -3.03775874 | 1.43280261  | 4.90726215  |
| H | -2.68640197 | 3.13069626  | 4.58754270  |
| C | 2.64199030  | -0.00131814 | 0.00031070  |
| C | 4.84618387  | 0.62818380  | -0.23228528 |
| H | 5.66508735  | 1.27994953  | -0.48000280 |
| C | 4.84516754  | -0.63402006 | 0.23388625  |
| H | 5.66303785  | -1.28696697 | 0.48190338  |
| C | 3.13674262  | 2.31055421  | -0.91551655 |
| C | 2.85361084  | 2.41277657  | -2.29308664 |
| C | 2.53857523  | 3.67500830  | -2.80256684 |
| H | 2.31672367  | 3.78561398  | -3.85706795 |
| C | 2.51153551  | 4.79517658  | -1.98037635 |
| H | 2.26587742  | 5.76613777  | -2.39680903 |
| C | 2.80190392  | 4.67393652  | -0.62862038 |
| H | 2.78111026  | 5.55554597  | 0.00085224  |
| C | 3.12021440  | 3.43388043  | -0.06561366 |
| C | 2.95225335  | 1.21085488  | -3.22690510 |
| H | 2.86594657  | 0.30929794  | -2.61809198 |
| C | 4.33077243  | 1.17812516  | -3.91814164 |
| H | 4.47509553  | 2.06568883  | -4.54179218 |
| H | 4.41622425  | 0.29619703  | -4.56006184 |
| H | 5.14390065  | 1.14379538  | -3.18931272 |
| C | 1.82409417  | 1.15310484  | -4.26898693 |
| H | 0.84211346  | 1.19078034  | -3.79369002 |
| H | 1.88665586  | 0.21675776  | -4.82987766 |
| H | 1.88867378  | 1.97141575  | -4.99218647 |
| C | 3.48237691  | 3.34438864  | 1.41338726  |
| H | 3.46984121  | 2.28912091  | 1.69299275  |
| C | 4.90976492  | 3.87379418  | 1.65962477  |
| H | 5.65009232  | 3.33291914  | 1.06514056  |
| H | 5.18052034  | 3.76553397  | 2.71410916  |
| H | 4.98482012  | 4.93425238  | 1.40038575  |
| C | 2.47222624  | 4.06584086  | 2.32130836  |
| H | 2.47179737  | 5.14678731  | 2.15412747  |
| H | 2.73173732  | 3.89872482  | 3.37089390  |
| H | 1.46033296  | 3.68838313  | 2.16118185  |
| C | 3.13295693  | -2.31391973 | 0.91636948  |
| C | 3.11521912  | -3.43725779 | 0.06650236  |



|   |            |             |             |
|---|------------|-------------|-------------|
| C | 2.79459434 | -4.67679080 | 0.62935802  |
| H | 2.77284773 | -5.55839400 | -0.00009107 |
| C | 2.50314389 | -4.79751430 | 1.98091982  |
| H | 2.25564632 | -5.76806403 | 2.39722246  |
| C | 2.53146768 | -3.67736724 | 2.80310001  |
| H | 2.30876913 | -3.78759420 | 3.85746055  |
| C | 2.84887271 | -2.41566433 | 2.29379042  |
| C | 3.47848888 | -3.34843048 | -1.41227172 |
| H | 3.46792379 | -2.29315815 | -1.69194011 |
| C | 4.90515490 | -3.88024088 | -1.65752397 |
| H | 5.64597008 | -3.34068289 | -1.06245266 |
| H | 5.17685349 | -3.77233927 | -2.71180257 |
| H | 4.97822912 | -4.94085097 | -1.39833931 |
| C | 2.46775000 | -4.06824757 | -2.32083405 |
| H | 2.46525347 | -5.14916048 | -2.15345008 |
| H | 2.72838238 | -3.90180282 | -3.37024817 |
| H | 1.45640840 | -3.68894304 | -2.16155982 |
| C | 2.94908636 | -1.21391335 | 3.22765743  |
| H | 2.86423934 | -0.31220663 | 2.61886106  |
| C | 4.32754065 | -1.18329595 | 3.91913795  |
| H | 4.47039620 | -2.07115134 | 4.54271010  |
| H | 4.41419777 | -0.30156321 | 4.56116583  |
| H | 5.14084938 | -1.15010013 | 3.19046478  |
| C | 1.82088695 | -1.15451659 | 4.26959302  |
| H | 0.83889821 | -1.19082449 | 3.79420235  |
| H | 1.88471514 | -0.21821730 | 4.83041754  |
| H | 1.88425646 | -1.97286012 | 4.99286146  |

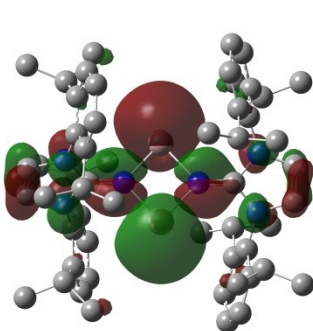

**HOMO** (isosurface value = 0.02)

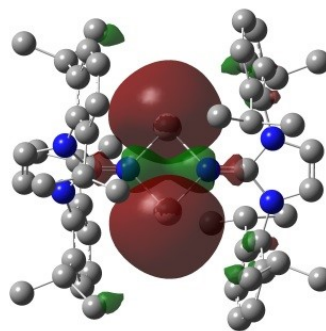

**HOMO-2** (isosurface value = 0.02)

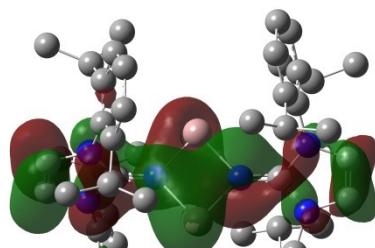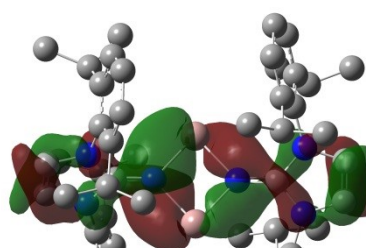

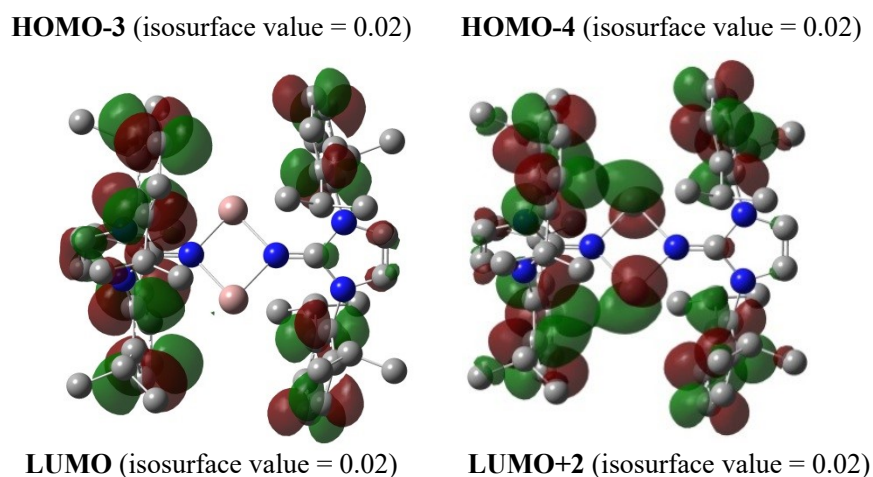

**Figure S4.** Plots of the frontier orbitals of compounds **1**.

**Table S3.** The NPA charges of **1** calculated at B3LYP/6-311G(d,p) level of theory.

| Atom | No | Charge   | Core     | Valence | Rydberg | Total    |
|------|----|----------|----------|---------|---------|----------|
| Ga   | 1  | 0.83813  | 27.99286 | 2.10792 | 0.06109 | 30.16187 |
| Ga   | 2  | 0.83810  | 27.99286 | 2.10795 | 0.06109 | 30.16190 |
| N    | 3  | -1.43588 | 1.99943  | 6.39516 | 0.04129 | 8.43588  |
| N    | 4  | -0.45995 | 1.99916  | 5.44762 | 0.01317 | 7.45995  |
| N    | 5  | -0.45995 | 1.99916  | 5.44762 | 0.01317 | 7.45995  |
| N    | 6  | -1.45424 | 1.99943  | 6.41774 | 0.03707 | 8.45424  |
| N    | 7  | -0.45709 | 1.99917  | 5.44468 | 0.01324 | 7.45709  |
| N    | 8  | -0.45708 | 1.99917  | 5.44467 | 0.01324 | 7.45708  |
| C    | 9  | 0.65902  | 1.99881  | 3.30386 | 0.03831 | 5.34098  |
| C    | 10 | -0.05652 | 1.99906  | 4.03816 | 0.01930 | 6.05652  |
| H    | 11 | 0.21779  | 0.00000  | 0.77910 | 0.00312 | 0.78221  |

|   |    |          |         |         |         |         |
|---|----|----------|---------|---------|---------|---------|
| C | 12 | -0.05654 | 1.99906 | 4.03818 | 0.01930 | 6.05654 |
| H | 13 | 0.21779  | 0.00000 | 0.77909 | 0.00312 | 0.78221 |
| C | 14 | 0.14470  | 1.99862 | 3.83501 | 0.02167 | 5.85530 |
| C | 15 | 0.00444  | 1.99882 | 3.97686 | 0.01988 | 5.99556 |
| C | 16 | -0.20652 | 1.99899 | 4.19195 | 0.01559 | 6.20652 |
| H | 17 | 0.20077  | 0.00000 | 0.79562 | 0.00361 | 0.79923 |
| C | 18 | -0.17150 | 1.99908 | 4.15684 | 0.01558 | 6.17150 |
| H | 19 | 0.19947  | 0.00000 | 0.79790 | 0.00263 | 0.80053 |
| C | 20 | -0.20908 | 1.99899 | 4.19460 | 0.01550 | 6.20908 |
| H | 21 | 0.20251  | 0.00000 | 0.79404 | 0.00345 | 0.79749 |
| C | 22 | 0.00645  | 1.99884 | 3.97558 | 0.01913 | 5.99355 |
| C | 23 | -0.21287 | 1.99911 | 4.19797 | 0.01579 | 6.21287 |
| H | 24 | 0.20585  | 0.00000 | 0.79007 | 0.00408 | 0.79415 |
| C | 25 | -0.55473 | 1.99926 | 4.54556 | 0.00991 | 6.55473 |
| H | 26 | 0.18963  | 0.00000 | 0.80794 | 0.00243 | 0.81037 |
| H | 27 | 0.19446  | 0.00000 | 0.80331 | 0.00223 | 0.80554 |
| H | 28 | 0.19115  | 0.00000 | 0.80680 | 0.00205 | 0.80885 |
| C | 29 | -0.56222 | 1.99929 | 4.55249 | 0.01044 | 6.56222 |
| H | 30 | 0.21735  | 0.00000 | 0.78046 | 0.00219 | 0.78265 |
| H | 31 | 0.19215  | 0.00000 | 0.80573 | 0.00212 | 0.80785 |
| H | 32 | 0.18462  | 0.00000 | 0.81322 | 0.00216 | 0.81538 |
| C | 33 | -0.20897 | 1.99913 | 4.19457 | 0.01528 | 6.20897 |
| H | 34 | 0.21207  | 0.00000 | 0.78312 | 0.00481 | 0.78793 |
| C | 35 | -0.55631 | 1.99926 | 4.54721 | 0.00984 | 6.55631 |
| H | 36 | 0.19620  | 0.00000 | 0.80170 | 0.00209 | 0.80380 |
| H | 37 | 0.19316  | 0.00000 | 0.80455 | 0.00229 | 0.80684 |
| H | 38 | 0.18911  | 0.00000 | 0.80825 | 0.00264 | 0.81089 |
| C | 39 | -0.56822 | 1.99928 | 4.55851 | 0.01042 | 6.56822 |
| H | 40 | 0.18377  | 0.00000 | 0.81379 | 0.00244 | 0.81623 |
| H | 41 | 0.19727  | 0.00000 | 0.80039 | 0.00234 | 0.80273 |

|   |    |          |         |         |         |         |
|---|----|----------|---------|---------|---------|---------|
| H | 42 | 0.21308  | 0.00000 | 0.78460 | 0.00232 | 0.78692 |
| C | 43 | 0.14469  | 1.99862 | 3.83502 | 0.02168 | 5.85531 |
| C | 44 | 0.00645  | 1.99884 | 3.97558 | 0.01913 | 5.99355 |
| C | 45 | -0.20909 | 1.99899 | 4.19460 | 0.01550 | 6.20909 |
| H | 46 | 0.20252  | 0.00000 | 0.79402 | 0.00345 | 0.79748 |
| C | 47 | -0.17150 | 1.99908 | 4.15683 | 0.01558 | 6.17150 |
| H | 48 | 0.19947  | 0.00000 | 0.79790 | 0.00263 | 0.80053 |
| C | 49 | -0.20652 | 1.99899 | 4.19194 | 0.01559 | 6.20652 |
| H | 50 | 0.20076  | 0.00000 | 0.79563 | 0.00361 | 0.79924 |
| C | 51 | 0.00443  | 1.99882 | 3.97687 | 0.01988 | 5.99557 |
| C | 52 | -0.20898 | 1.99913 | 4.19458 | 0.01527 | 6.20898 |
| H | 53 | 0.21210  | 0.00000 | 0.78308 | 0.00481 | 0.78790 |
| C | 54 | -0.55631 | 1.99926 | 4.54721 | 0.00984 | 6.55631 |
| H | 55 | 0.19621  | 0.00000 | 0.80170 | 0.00209 | 0.80379 |
| H | 56 | 0.19316  | 0.00000 | 0.80455 | 0.00229 | 0.80684 |
| H | 57 | 0.18911  | 0.00000 | 0.80825 | 0.00264 | 0.81089 |
| C | 58 | -0.56825 | 1.99928 | 4.55855 | 0.01042 | 6.56825 |
| H | 59 | 0.18378  | 0.00000 | 0.81378 | 0.00244 | 0.81622 |
| H | 60 | 0.19728  | 0.00000 | 0.80037 | 0.00234 | 0.80272 |
| H | 61 | 0.21308  | 0.00000 | 0.78460 | 0.00232 | 0.78692 |
| C | 62 | -0.21287 | 1.99911 | 4.19797 | 0.01579 | 6.21287 |
| H | 63 | 0.20585  | 0.00000 | 0.79007 | 0.00408 | 0.79415 |
| C | 64 | -0.55474 | 1.99926 | 4.54556 | 0.00991 | 6.55474 |
| H | 65 | 0.18963  | 0.00000 | 0.80794 | 0.00243 | 0.81037 |
| H | 66 | 0.19446  | 0.00000 | 0.80331 | 0.00223 | 0.80554 |
| H | 67 | 0.19116  | 0.00000 | 0.80679 | 0.00205 | 0.80884 |
| C | 68 | -0.56221 | 1.99929 | 4.55248 | 0.01044 | 6.56221 |
| H | 69 | 0.21735  | 0.00000 | 0.78047 | 0.00219 | 0.78265 |
| H | 70 | 0.19215  | 0.00000 | 0.80572 | 0.00212 | 0.80785 |
| H | 71 | 0.18462  | 0.00000 | 0.81321 | 0.00216 | 0.81538 |

|   |     |          |         |         |         |         |
|---|-----|----------|---------|---------|---------|---------|
| C | 72  | 0.66455  | 1.99880 | 3.29861 | 0.03804 | 5.33545 |
| C | 73  | -0.05496 | 1.99907 | 4.03660 | 0.01930 | 6.05496 |
| H | 74  | 0.21710  | 0.00000 | 0.77981 | 0.00309 | 0.78290 |
| C | 75  | -0.05496 | 1.99907 | 4.03659 | 0.01930 | 6.05496 |
| H | 76  | 0.21710  | 0.00000 | 0.77981 | 0.00309 | 0.78290 |
| C | 77  | 0.15113  | 1.99865 | 3.82957 | 0.02065 | 5.84887 |
| C | 78  | 0.00644  | 1.99886 | 3.97527 | 0.01942 | 5.99356 |
| C | 79  | -0.21381 | 1.99899 | 4.19929 | 0.01552 | 6.21381 |
| H | 80  | 0.20210  | 0.00000 | 0.79436 | 0.00355 | 0.79790 |
| C | 81  | -0.17524 | 1.99908 | 4.16049 | 0.01567 | 6.17524 |
| H | 82  | 0.19947  | 0.00000 | 0.79786 | 0.00267 | 0.80053 |
| C | 83  | -0.20855 | 1.99900 | 4.19401 | 0.01555 | 6.20855 |
| H | 84  | 0.20125  | 0.00000 | 0.79511 | 0.00364 | 0.79875 |
| C | 85  | 0.00515  | 1.99885 | 3.97653 | 0.01947 | 5.99485 |
| C | 86  | -0.20924 | 1.99912 | 4.19456 | 0.01555 | 6.20924 |
| H | 87  | 0.20952  | 0.00000 | 0.78601 | 0.00447 | 0.79048 |
| C | 88  | -0.55557 | 1.99926 | 4.54642 | 0.00990 | 6.55557 |
| H | 89  | 0.18911  | 0.00000 | 0.80835 | 0.00254 | 0.81089 |
| H | 90  | 0.19409  | 0.00000 | 0.80368 | 0.00223 | 0.80591 |
| H | 91  | 0.19487  | 0.00000 | 0.80303 | 0.00210 | 0.80513 |
| C | 92  | -0.55984 | 1.99929 | 4.55029 | 0.01026 | 6.55984 |
| H | 93  | 0.20908  | 0.00000 | 0.78900 | 0.00192 | 0.79092 |
| H | 94  | 0.19972  | 0.00000 | 0.79823 | 0.00205 | 0.80028 |
| H | 95  | 0.18308  | 0.00000 | 0.81468 | 0.00224 | 0.81692 |
| C | 96  | -0.21137 | 1.99912 | 4.19641 | 0.01585 | 6.21137 |
| H | 97  | 0.20673  | 0.00000 | 0.78918 | 0.00408 | 0.79327 |
| C | 98  | -0.55448 | 1.99926 | 4.54532 | 0.00990 | 6.55448 |
| H | 99  | 0.19123  | 0.00000 | 0.80673 | 0.00204 | 0.80877 |
| H | 100 | 0.19449  | 0.00000 | 0.80328 | 0.00223 | 0.80551 |
| H | 101 | 0.18926  | 0.00000 | 0.80826 | 0.00248 | 0.81074 |

|   |     |          |         |         |         |         |
|---|-----|----------|---------|---------|---------|---------|
| C | 102 | -0.56344 | 1.99929 | 4.55358 | 0.01058 | 6.56344 |
| H | 103 | 0.18226  | 0.00000 | 0.81557 | 0.00217 | 0.81774 |
| H | 104 | 0.19427  | 0.00000 | 0.80363 | 0.00210 | 0.80573 |
| H | 105 | 0.21931  | 0.00000 | 0.77824 | 0.00245 | 0.78069 |
| C | 106 | 0.15112  | 1.99865 | 3.82958 | 0.02065 | 5.84888 |
| C | 107 | 0.00516  | 1.99885 | 3.97652 | 0.01948 | 5.99484 |
| C | 108 | -0.20855 | 1.99900 | 4.19401 | 0.01555 | 6.20855 |
| H | 109 | 0.20125  | 0.00000 | 0.79511 | 0.00364 | 0.79875 |
| C | 110 | -0.17523 | 1.99908 | 4.16048 | 0.01567 | 6.17523 |
| H | 111 | 0.19947  | 0.00000 | 0.79786 | 0.00268 | 0.80053 |
| C | 112 | -0.21382 | 1.99899 | 4.19930 | 0.01553 | 6.21382 |
| H | 113 | 0.20210  | 0.00000 | 0.79435 | 0.00354 | 0.79790 |
| C | 114 | 0.00644  | 1.99886 | 3.97528 | 0.01942 | 5.99356 |
| C | 115 | -0.21138 | 1.99912 | 4.19641 | 0.01585 | 6.21138 |
| H | 116 | 0.20673  | 0.00000 | 0.78918 | 0.00408 | 0.79327 |
| C | 117 | -0.55448 | 1.99926 | 4.54532 | 0.00990 | 6.55448 |
| H | 118 | 0.19122  | 0.00000 | 0.80674 | 0.00204 | 0.80878 |
| H | 119 | 0.19449  | 0.00000 | 0.80328 | 0.00223 | 0.80551 |
| H | 120 | 0.18926  | 0.00000 | 0.80826 | 0.00248 | 0.81074 |
| C | 121 | -0.56346 | 1.99929 | 4.55359 | 0.01058 | 6.56346 |
| H | 122 | 0.18226  | 0.00000 | 0.81557 | 0.00217 | 0.81774 |
| H | 123 | 0.19426  | 0.00000 | 0.80364 | 0.00210 | 0.80574 |
| H | 124 | 0.21932  | 0.00000 | 0.77823 | 0.00245 | 0.78068 |
| C | 125 | -0.20924 | 1.99912 | 4.19456 | 0.01555 | 6.20924 |
| H | 126 | 0.20952  | 0.00000 | 0.78601 | 0.00447 | 0.79048 |
| C | 127 | -0.55557 | 1.99926 | 4.54641 | 0.00990 | 6.55557 |
| H | 128 | 0.18911  | 0.00000 | 0.80835 | 0.00254 | 0.81089 |
| H | 129 | 0.19409  | 0.00000 | 0.80368 | 0.00223 | 0.80591 |
| H | 130 | 0.19487  | 0.00000 | 0.80303 | 0.00210 | 0.80513 |
| C | 131 | -0.55986 | 1.99929 | 4.55030 | 0.01026 | 6.55986 |

|       |         |         |         |         |         |
|-------|---------|---------|---------|---------|---------|
| H 132 | 0.20908 | 0.00000 | 0.78899 | 0.00192 | 0.79092 |
| H 133 | 0.19972 | 0.00000 | 0.79823 | 0.00205 | 0.80028 |
| H 134 | 0.18308 | 0.00000 | 0.81468 | 0.00224 | 0.81692 |

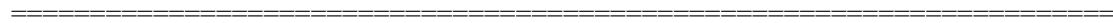

|           |         |           |           |         |           |
|-----------|---------|-----------|-----------|---------|-----------|
| * Total * | 0.00000 | 175.92995 | 322.75428 | 1.31578 | 500.00000 |
|-----------|---------|-----------|-----------|---------|-----------|

#### 4. References

- [S1] G. M. Sheldrick, SHELXL-97, Program for Crystal Structure Refinement; University of Göttingen: Göttingen, Germany, **1997**.
- [S2] Bruker AXS SHELXTL, Madison, WI; SHELX-97G. M. Sheldrick, *Acta Crystallogr. A*, **2008**, *64*, 112–122, *SHELX-2013*, <http://shelx.uni-ac.gwdg.de/SHELX/index.php>.
- [S3] Gaussian 09, Revision E.01, M. J. Frisch, G. W. Trucks, H. B. Schlegel, G. E. Scuseria, M. A. Robb, J. R. Cheeseman, G. Scalmani, V. Barone, B. Mennucci, G. A. Petersson, H. Nakatsuji, M. Caricato, X. Li, H. P. Hratchian, A. F. Izmaylov, J. Bloino, G. Zheng, J. L. Sonnenberg, M. Hada, M. Ehara, K. Toyota, R. Fukuda, J. Hasegawa, M. Ishida, T. Nakajima, Y. Honda, O. Kitao, H. Nakai, T. Vreven, J. A. Montgomery, Jr., J. E. Peralta, F. Ogliaro, M. Bearpark, J. J. Heyd, E. Brothers, K. N. Kudin, V. N. Staroverov, T. Keith, R. Kobayashi, J. Normand, K. Raghavachari, A. Rendell, J. C. Burant, S. S. Iyengar, J. Tomasi, M. Cossi, N. Rega, J. M. Millam, M. Klene, J. E. Knox, J. B. Cross, V. Bakken, C. Adamo, J. Jaramillo, R. Gomperts, R. E. Stratmann, O. Yazyev, A. J. Austin, R. Cammi, C. Pomelli, J. W. Ochterski, R. L. Martin, K. Morokuma, V. G. Zakrzewski, G. A. Voth, P. Salvador, J. J. Dannenberg, S. Dapprich, A. D. Daniels, O. Farkas, J. B. Foresman, J. V. Ortiz, J. Cioslowski, and D. J. Fox, Gaussian, Inc., Wallingford CT, **2013**.



## 5. NMR spectrum

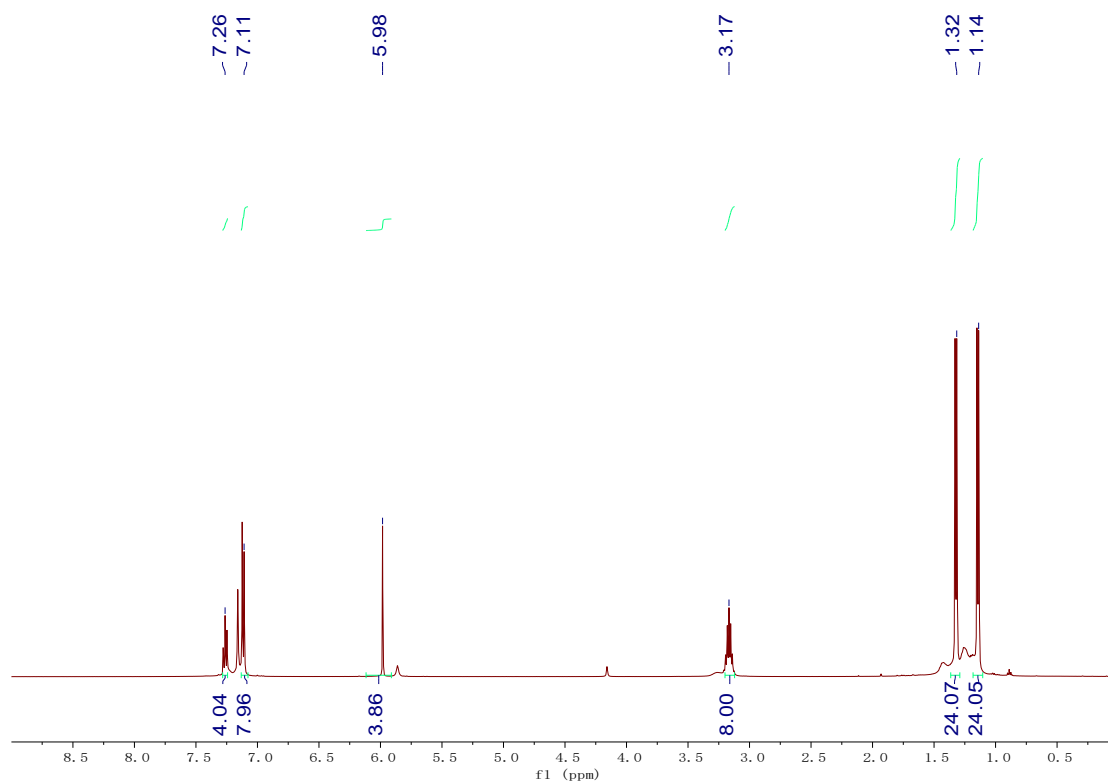

Figure S5. <sup>1</sup>H NMR (500 MHz) spectrum of **1** in C<sub>6</sub>D<sub>6</sub>.

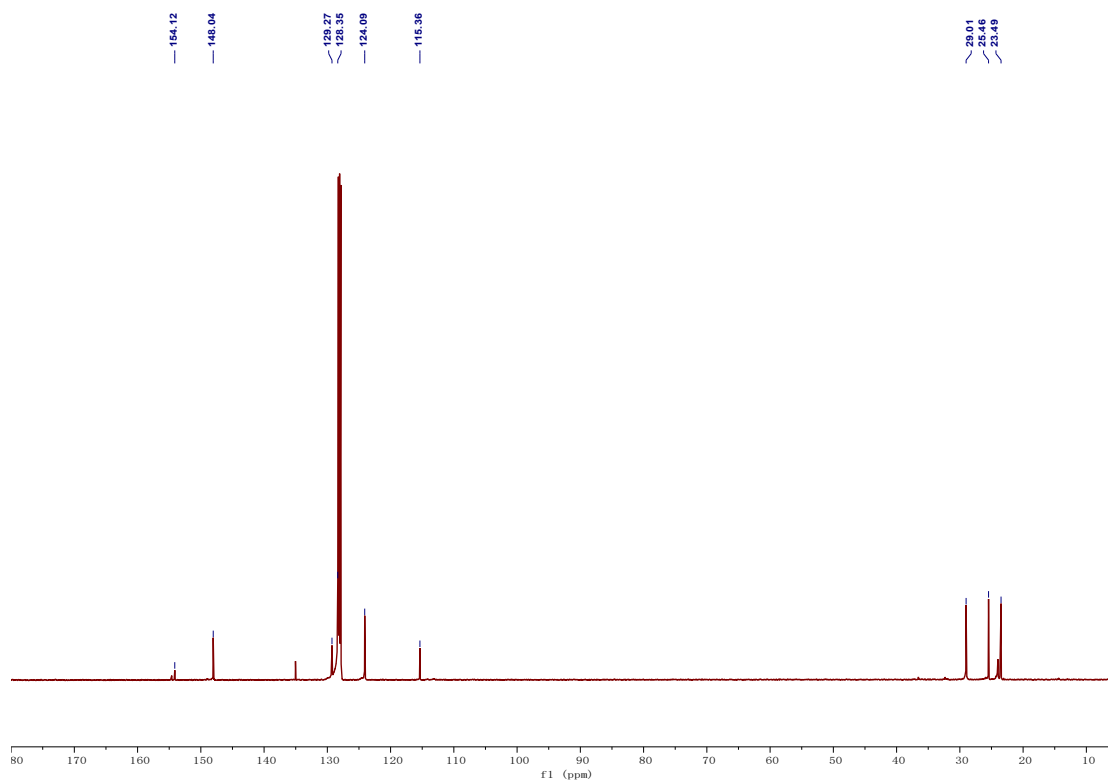

Figure S6. <sup>13</sup>C NMR (126 MHz) spectrum of **1** in C<sub>6</sub>D<sub>6</sub>.

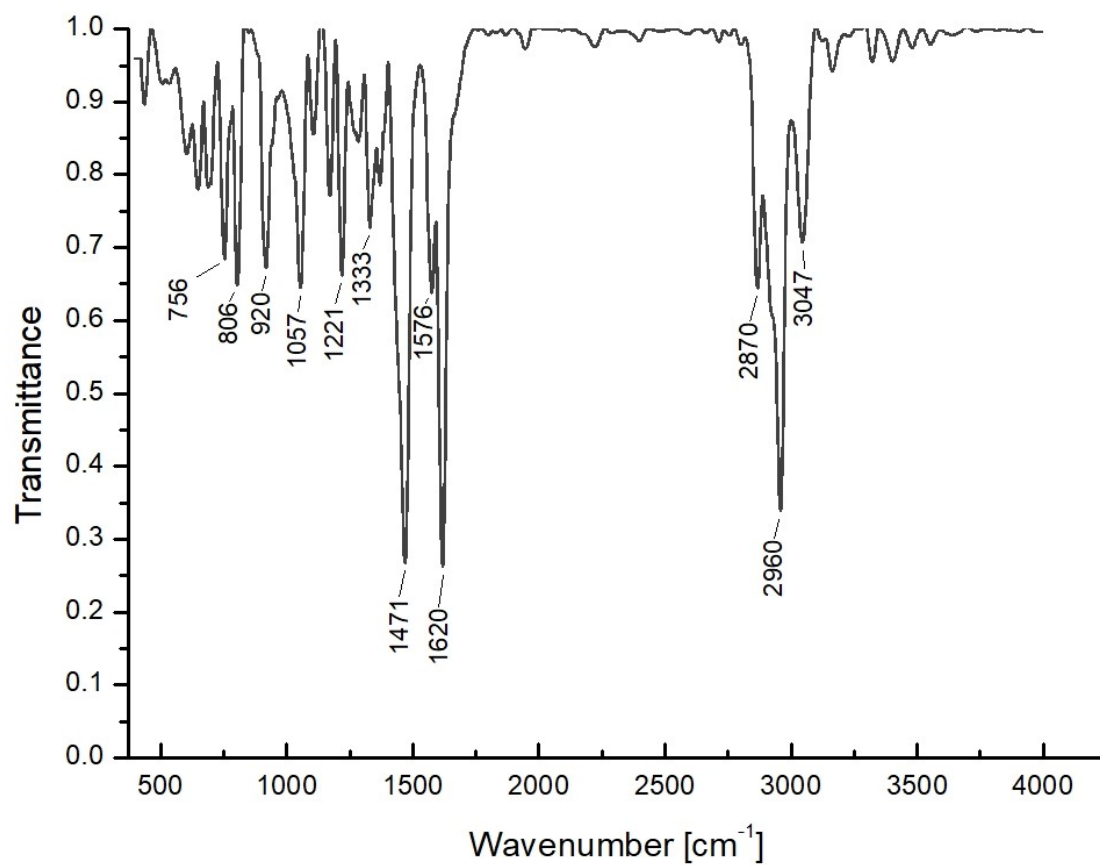

Figure S7. FT-IR spectrum of 1.

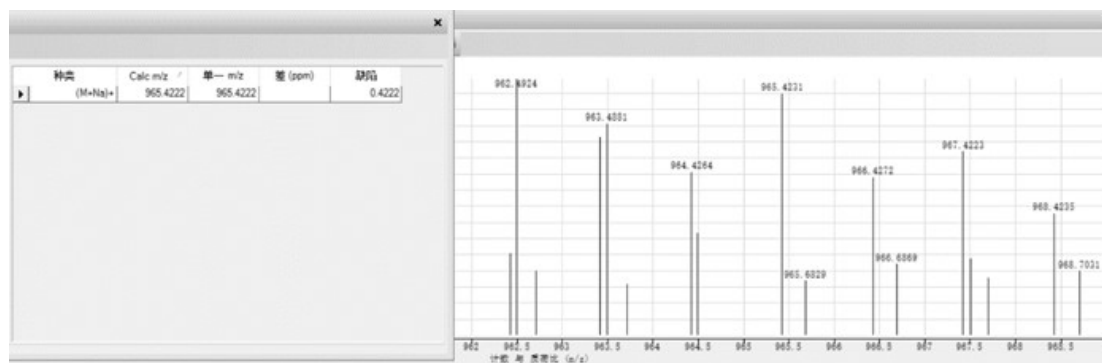

Figure S8. HRMS spectrum of 1.

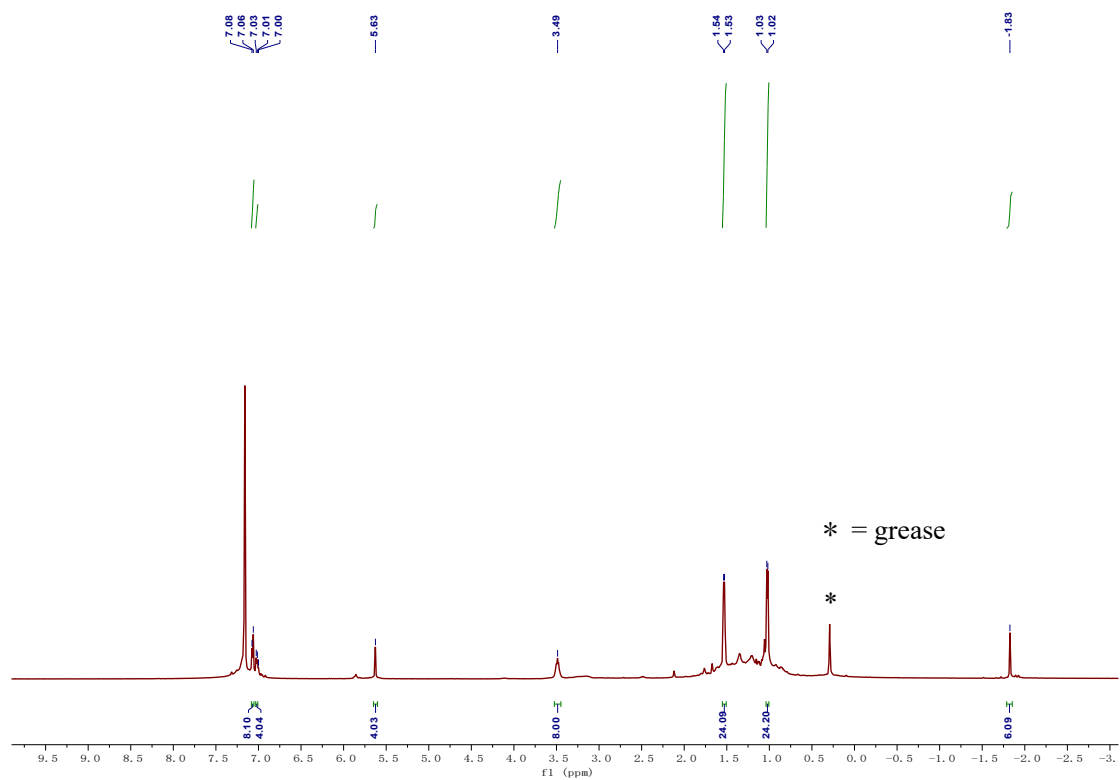

Figure S9.  $^1\text{H}$  NMR (500 MHz) spectrum of **2** in  $\text{C}_6\text{D}_6$ .

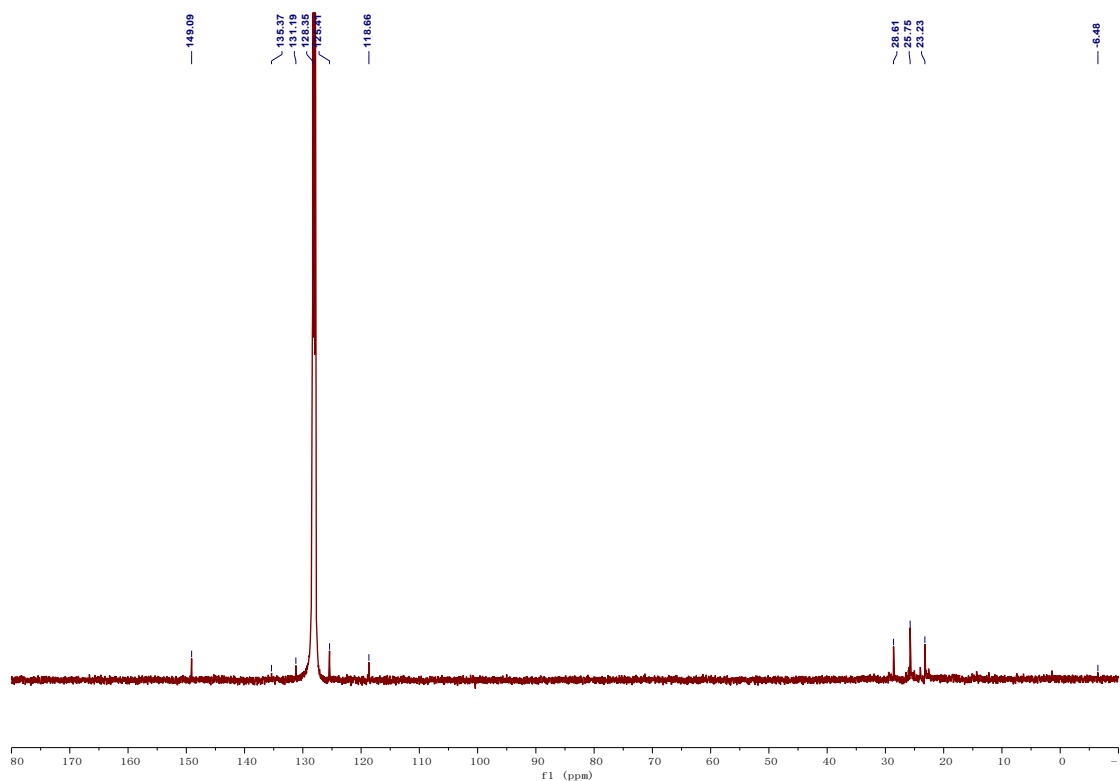

Figure S10.  $^{13}\text{C}$  NMR (126 MHz) spectrum of **2** in  $\text{C}_6\text{D}_6$ .

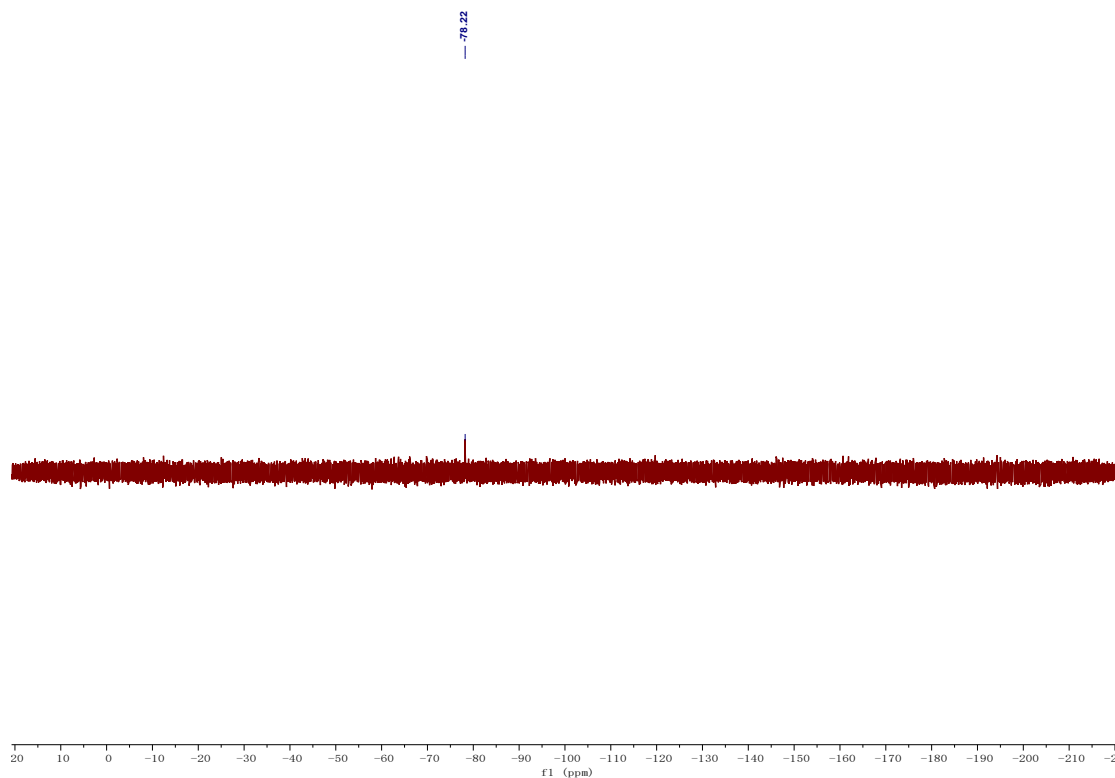

Figure S11.  $^{19}\text{F}$  NMR (470.4 MHz) spectrum of **2** in  $\text{C}_6\text{D}_6$ .

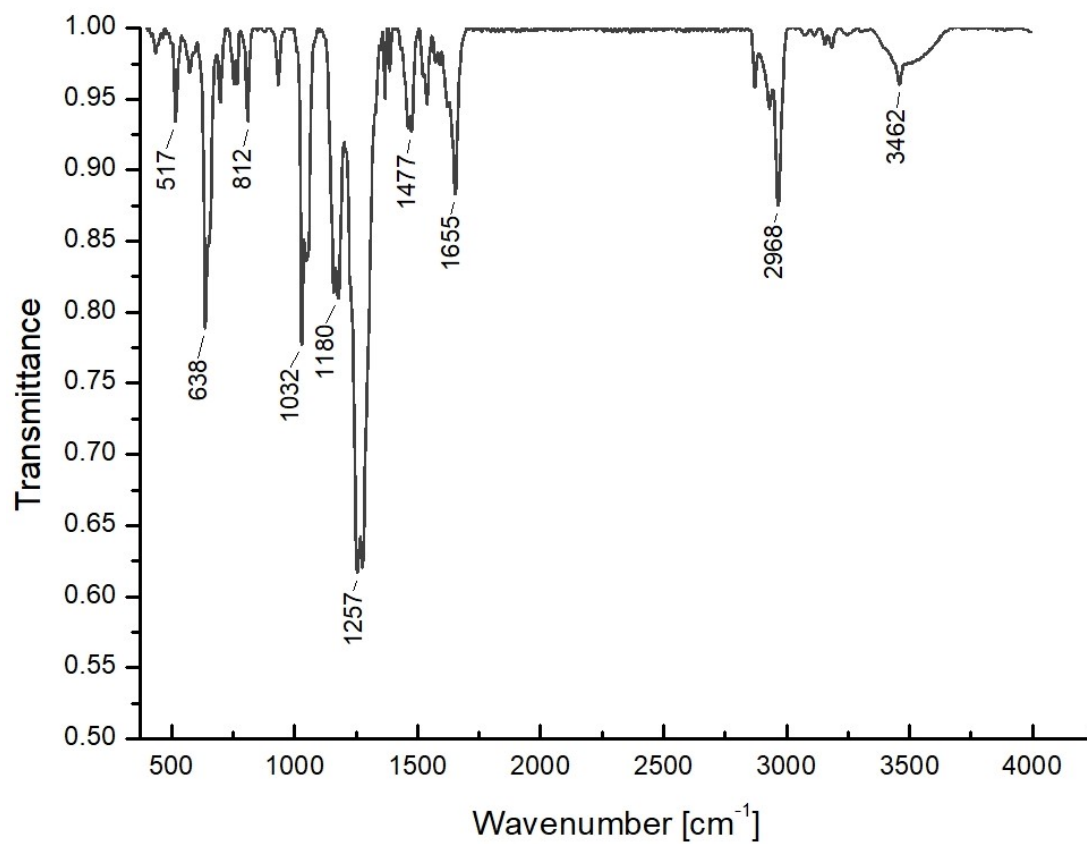

Figure S12. FT-IR spectrum of **2**.

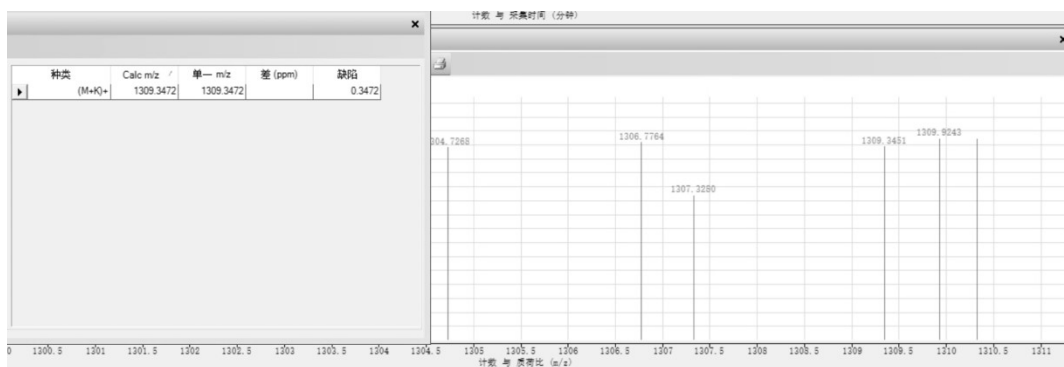

Figure S13. HRMS spectrum of 2.

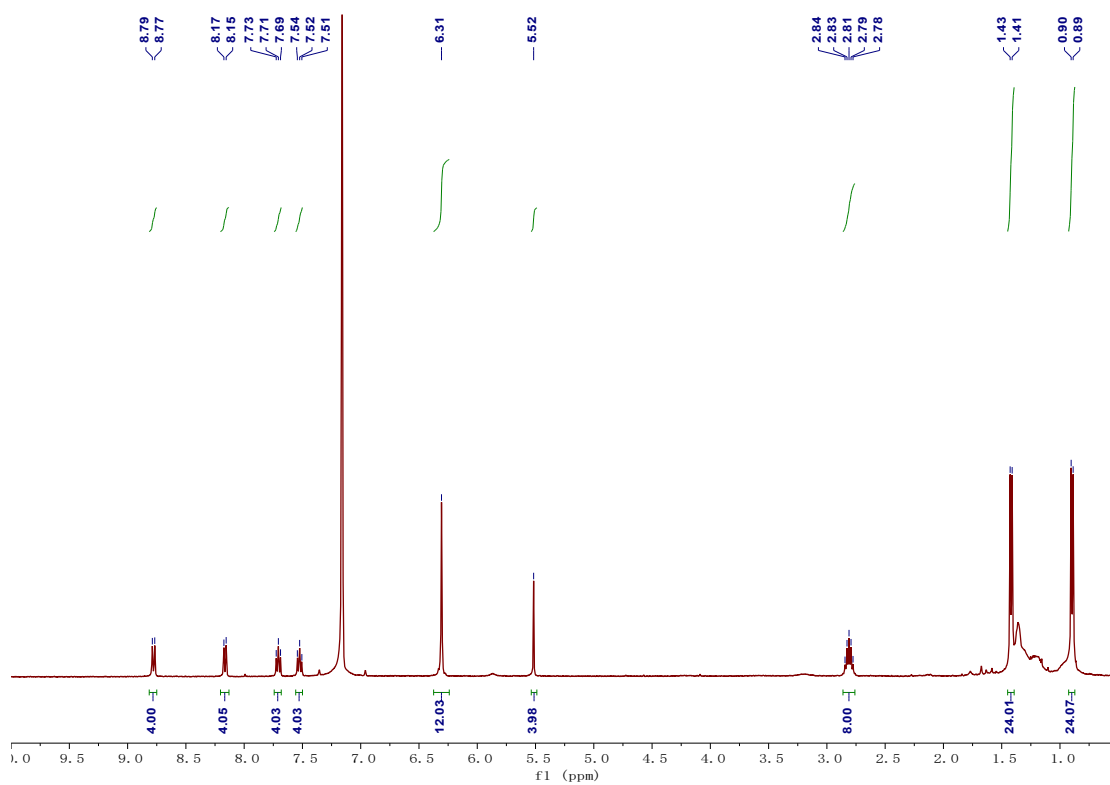

Figure S14. <sup>1</sup>H NMR (500 MHz) spectrum of 3 in C<sub>6</sub>D<sub>6</sub>.

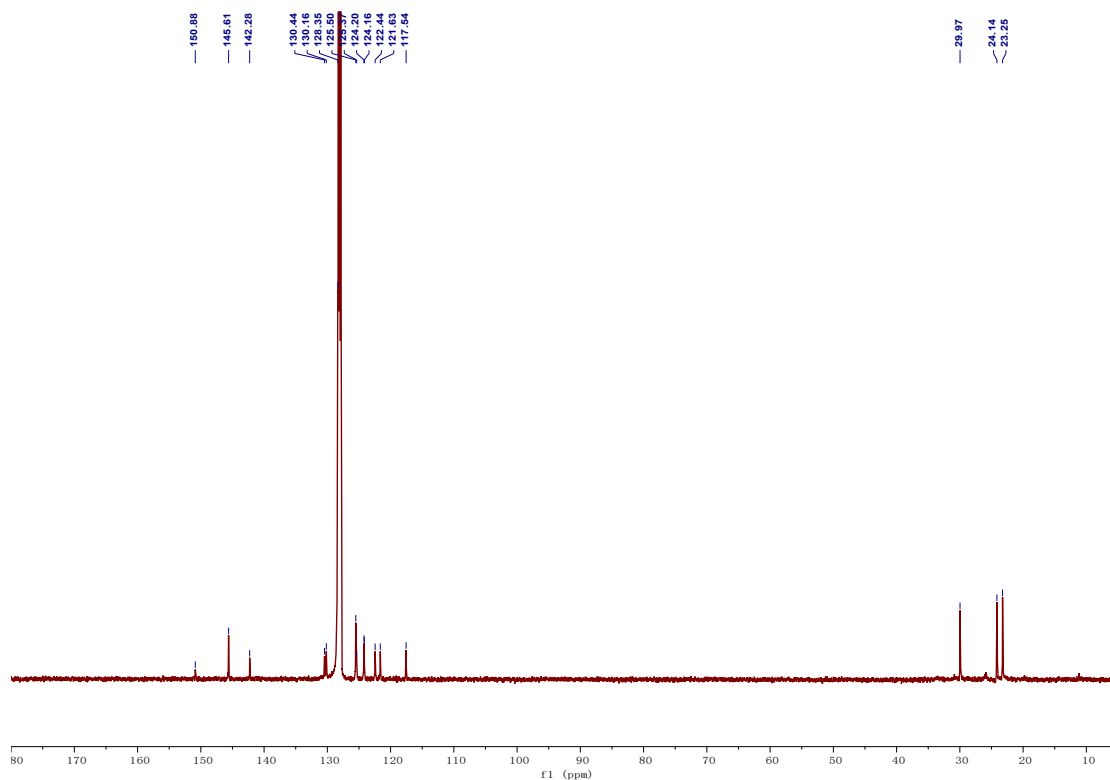

Figure S15.  $^{13}\text{C}$  NMR (126 MHz) spectrum of **3** in  $\text{C}_6\text{D}_6$ .

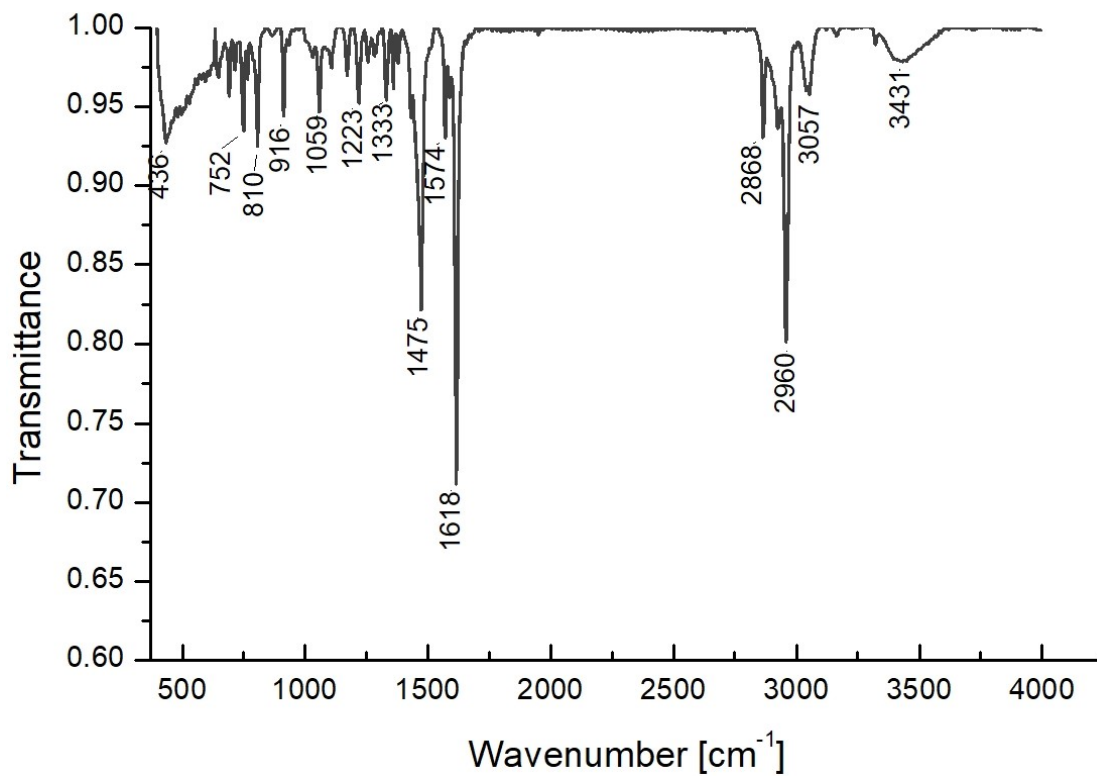

Figure S16. FT-IR spectrum of **3**.

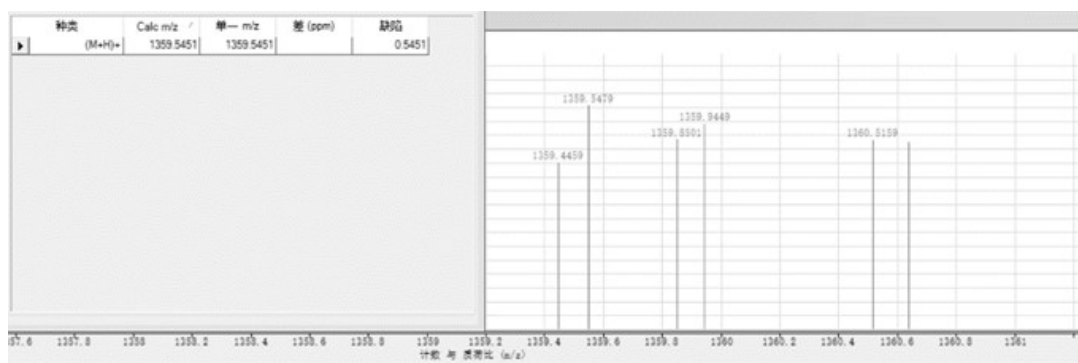

Figure S17. HRMS spectrum of **3**.

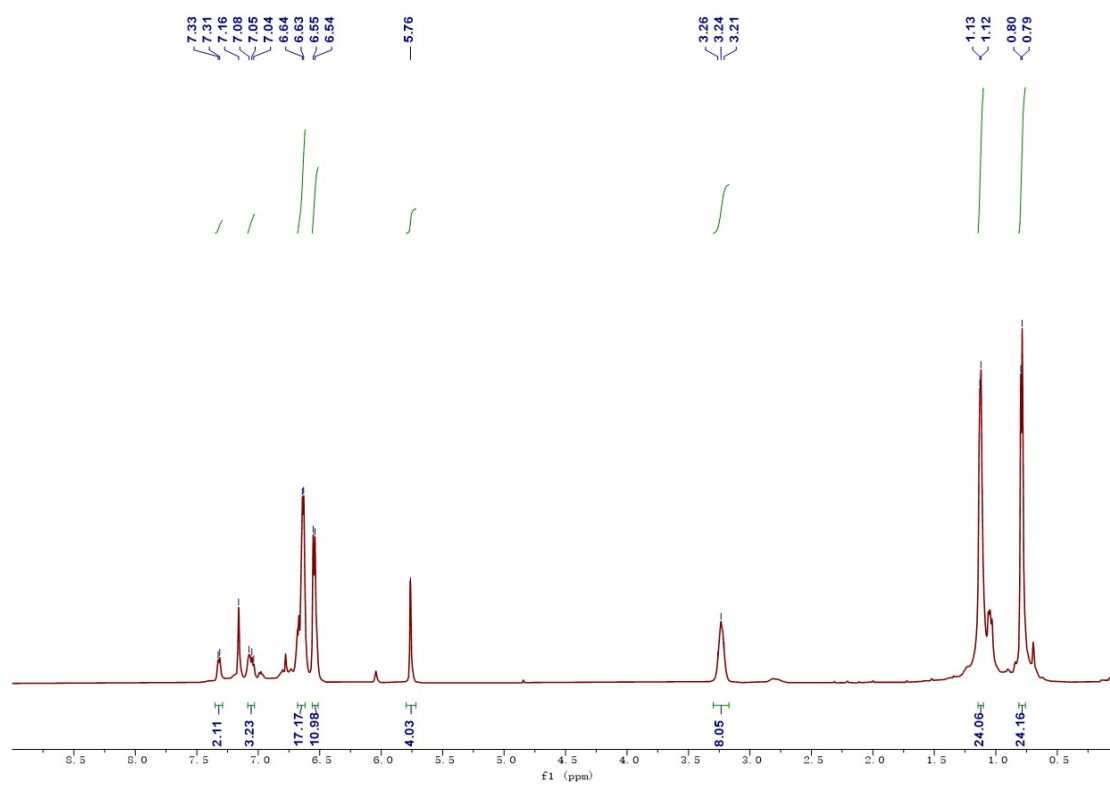

Figure S18. <sup>1</sup>H NMR (500 MHz) spectrum of **4** in C<sub>6</sub>D<sub>6</sub>.

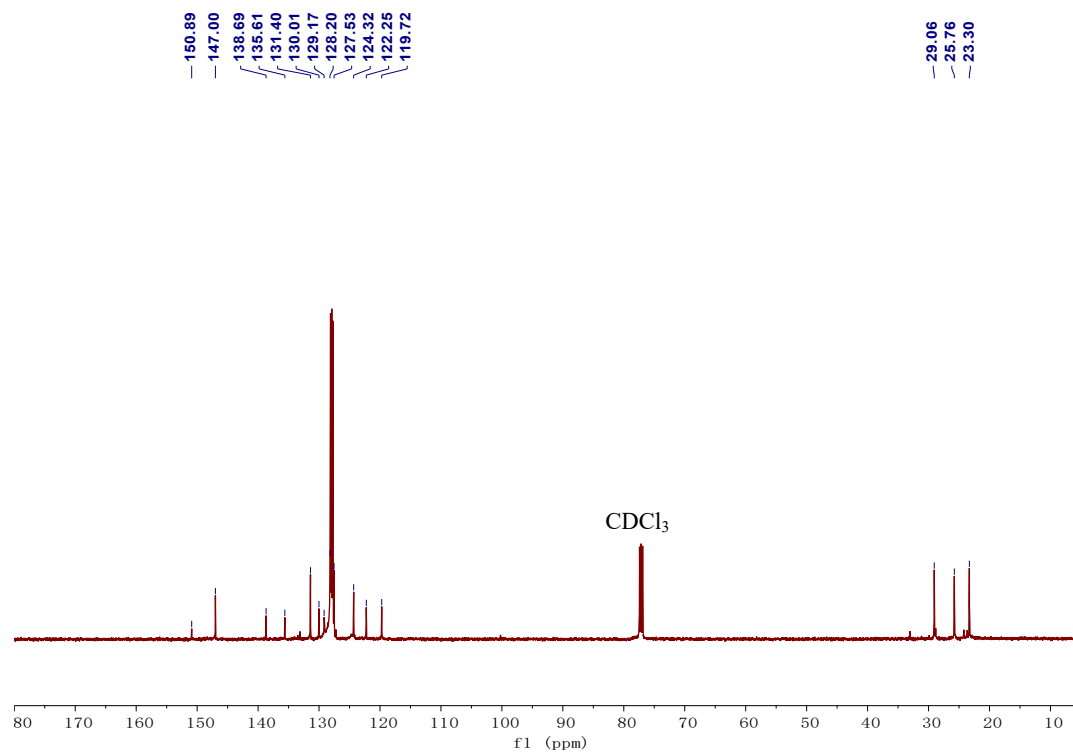

Figure S19. <sup>13</sup>C NMR (126 MHz) spectrum of **4** in C<sub>6</sub>D<sub>6</sub>.

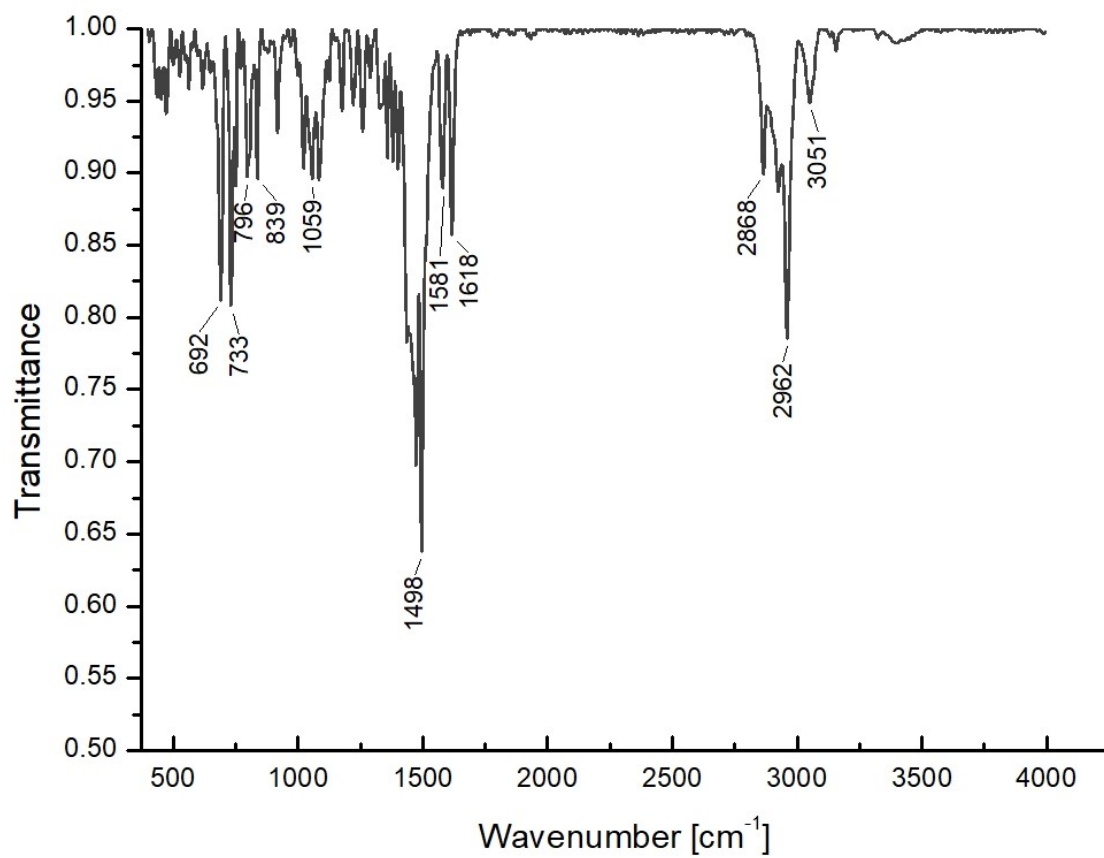

Figure S20. FT-IR spectrum of **4**.



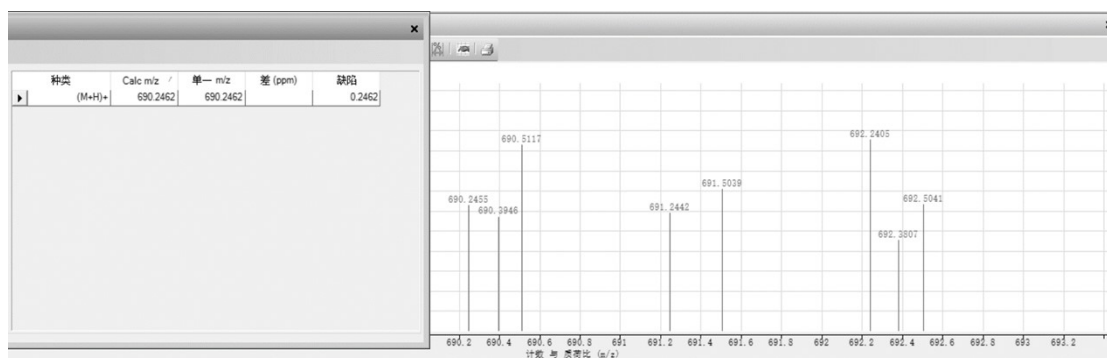

Figure S21. HRMS spectrum of **4**.

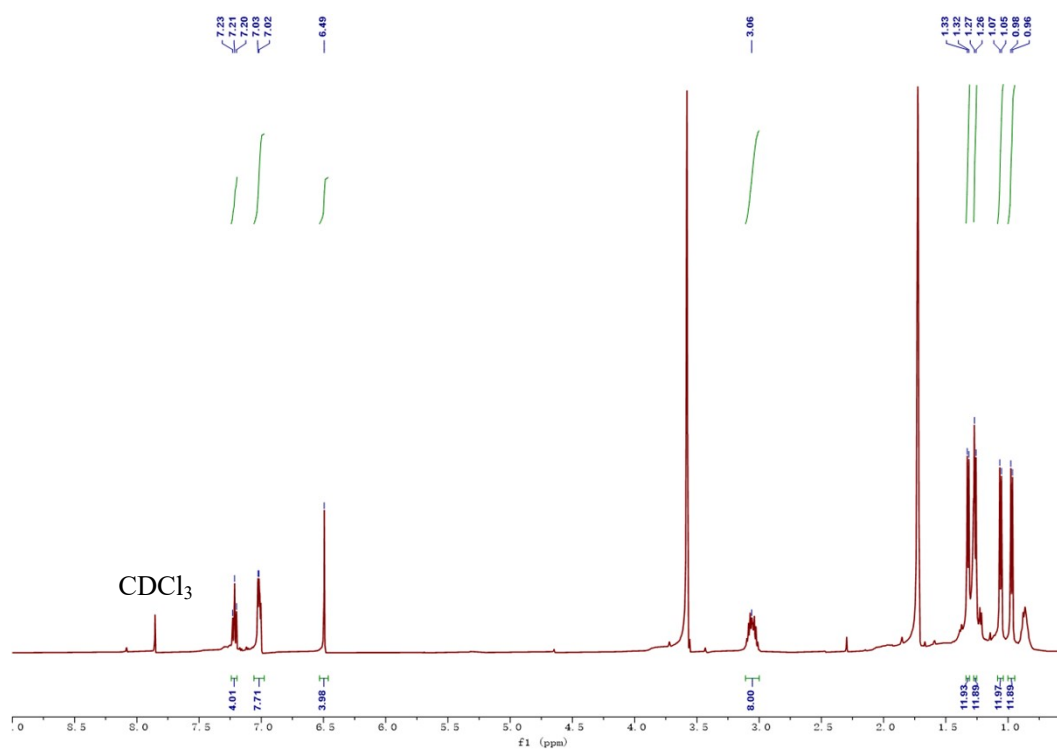

Figure S22. <sup>1</sup>H NMR (500 MHz) spectrum of **5** in THF-*d*<sub>8</sub>.

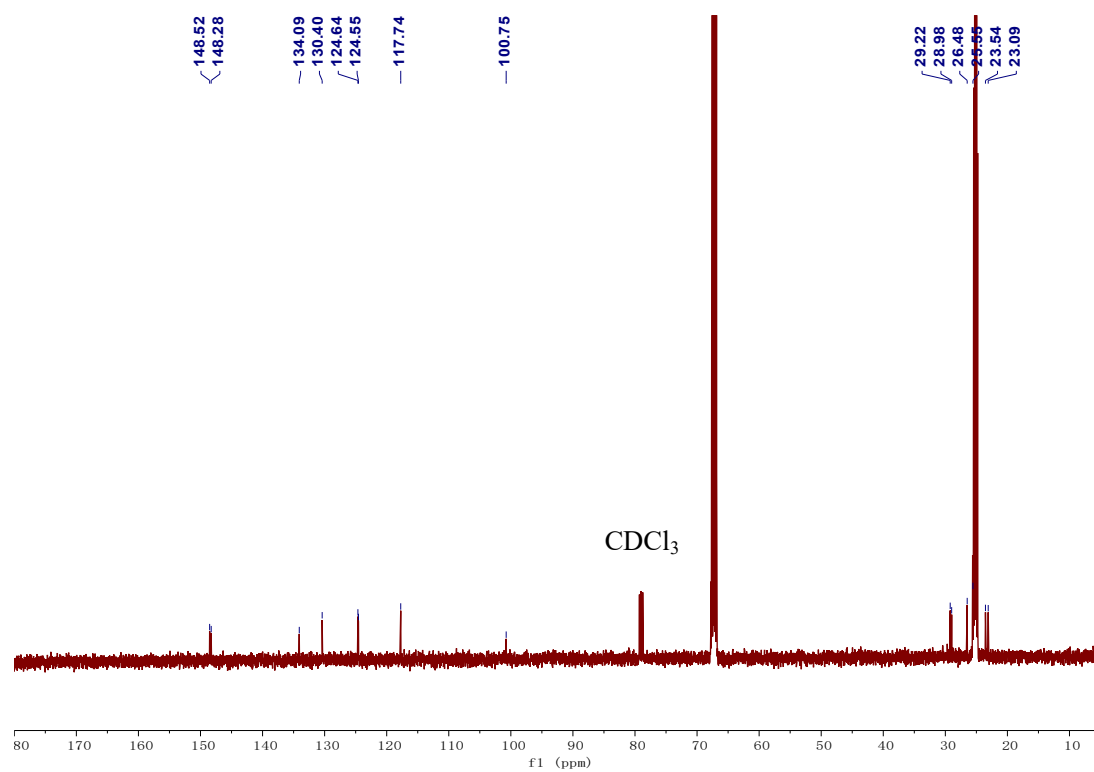

Figure S23. <sup>13</sup>C NMR (126 MHz) spectrum of **5** in THF-*d*<sub>8</sub>.

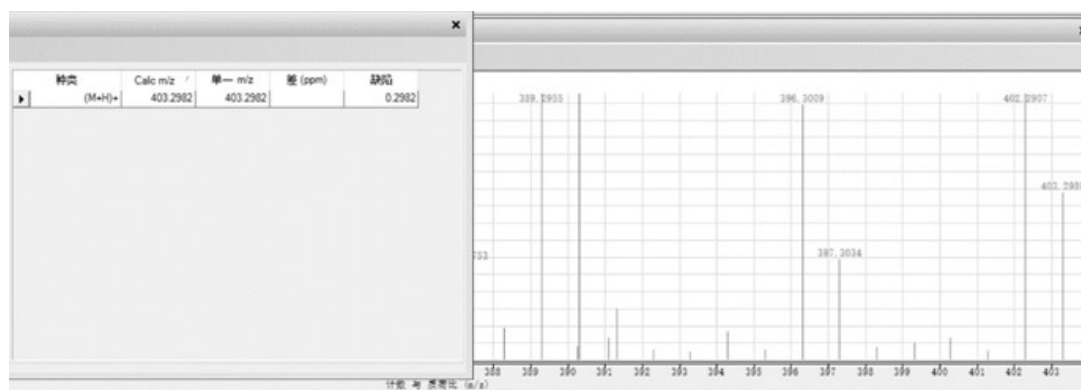

Figure S24. HRMS spectrum of **5**.
